# Supplementary material for: Ultrasound-responsive nanocarriers with siRNA and Fe3O4 regulate macrophage polarization and phagocytosis for augmented non-small cell lung cancer immunotherapy
Source: PubMed Central journal article supplement — J Nanobiotechnology. 2024 Oct 7;22:605. doi: 10.1186/s12951-024-02883-w (PMC11460142; doi:10.1186/s12951-024-02883-w), 2024-10-07
Supplement: 12951_2024_2883_MOESM1_ESM.pdf [file 12951_2024_2883_MOESM1_ESM.pdf]

Ultrasound-responsive nanocarriers with siRNA and Fe<sub>3</sub>O<sub>4</sub> regulate macrophage polarization and phagocytosis for augmented non-small cell lung cancer Immunotherapy

Ming Li<sup>a,1</sup>, Yuanyuan Li<sup>a,1</sup>, Jun Zheng<sup>b,1</sup>, Zhen Ma<sup>c</sup>, Jianye Zhang<sup>d</sup>, Hao Wu<sup>a</sup>, Yangyang Zhu<sup>a</sup>, Pan Li<sup>b,\*</sup>, Fang Nie<sup>a,\*</sup>

<sup>a</sup> Ultrasound Medical Center, Lanzhou University Second Hospital, Gansu Province Clinical Research Center for Ultrasonography, Gansu Province Medical Engineering Research Center for Intelligence Ultrasound, Lanzhou 730000, China.

<sup>b</sup> State Key Laboratory of Ultrasound in Medicine and Engineering, Institute of Ultrasound Imaging, The Second Affiliated Hospital, Chongqing Medical University, Chongqing, 400010, People's Republic of China.

<sup>c</sup> Peking University Third Hospital, Beijing, 100191, China.

<sup>d</sup> Department of Urology, Peking University First Hospital, Beijing, China.

Corresponding authors at: State Key Laboratory of Ultrasound in Medicine and Engineering, Institute of Ultrasound Imaging, The Second Affiliated Hospital, Chongqing Medical University, Chongqing, 400010, People's Republic of China (Pan Li) and Ultrasound Medical Center, Lanzhou University Second Hospital, Gansu Province Clinical Research Center for Ultrasonography, Gansu Province Medical Engineering Research Center for Intelligence Ultrasound, Lanzhou 730000, China (Fang Nie).

**Email address:** [lipan@hospital.cqmu.edu.cn](mailto:lipan@hospital.cqmu.edu.cn) (Pan Li) and [ery\\_nief@lzu.edu.cn](mailto:ery_nief@lzu.edu.cn) (Fang Nie).

<sup>1</sup>These authors contributed equally to this work.

Telephone: +860931-8942279.

**Table S1.** Sequences of SIRP $\alpha$  siRNAs

| Gene             | Sense                            | Antisense                       |
|------------------|----------------------------------|---------------------------------|
| SIRP $\alpha$ -1 | 5'-GCCUGACACAGAAUA<br>CAATT-3'   | 5'-UUGUAUUUCUGUGUCA<br>GGCTT-3' |
| SIRP $\alpha$ -2 | 5'-CCGGAUCAAAACAGAAG<br>AAATT-3' | 5'-UUUCUUCUGUUUGAUC<br>CGGTT-3' |
| SIRP $\alpha$ -3 | 5'-CGCCCAAGAAUCUCAC<br>AAATT-3'  | 5'-UUUGUGAGAUUCUUGG<br>GCGTT-3' |

**Table S2.** Information of flow cytometry antibodies used in this study

| <b>Antibodies</b>                            |           |                 |  |
|----------------------------------------------|-----------|-----------------|--|
| CD206 (MMR) Monoclonal Antibody (MR6F3), PE, | Thermo    | Cat. 12-2061-82 |  |
| CD86 (B7-2) Monoclonal Antibody (GL1), FITC  | Thermo    | Cat. 11-0862-82 |  |
| FOXP3 Monoclonal Antibody (FJK-16s), PE      | Thermo    | Cat. 12-5773-82 |  |
| CD8a Monoclonal Antibody (53-6.7), FITC      | Thermo    | Cat. 11-0081-82 |  |
| CD3 Monoclonal Antibody (17A2), PE           | Thermo    | Cat. 12-0032-82 |  |
| Ki-67 Monoclonal Antibody (SolA15), PE       | Thermo    | Cat. 12-5698-82 |  |
| CD69 Monoclonal Antibody (H1.2F3), PE        | Thermo    | Cat. 12-0691-82 |  |
| CD4 Monoclonal Antibody (GK1.5), FITC        | Thermo    | Cat.11-0041-82  |  |
| IFN gamma Monoclonal Antibody (XMG1.2), PE   | Thermo    | Cat. 12-7311-82 |  |
| Anti-Mouse F4/80, APC                        | LIANKEBIO | Cat. F21480A03  |  |

**Table S3.** Information of antibodies assays used in Western Blot assay.

| <b>Antibodies</b>  |             |                 |
|--------------------|-------------|-----------------|
| Anti-SIRP $\alpha$ | Proteintech | Cat. 67337-1-Ig |
| Anti-GAPDH         | Servicebio  | Cat. GB15002    |
| Anti-IRF5          | Proteintech | Cat.10547-1-AP  |

**Table S4.** Sequences of PCR primers used in this study

| PCR primers   |                                                                                   |
|---------------|-----------------------------------------------------------------------------------|
| TNF- $\alpha$ | Forward: 5'-CCTCTTCTCATTCCCTGCTTGTGG-3'<br>Reverse: 5'-ATCACCCCGAAGTTCAGTAGACA-3' |
| IFN- $\gamma$ | Forward: 5'-ACTATTTAACTCAAGTGGCAT-3'<br>Reverse: 5'-CCATCCTTTTGCCAGTTCC-3'        |
| IL-10         | Forward: 5'-CTGCTCTTACTGACTGGCAT-3'<br>Reverse: 5'-AGTTATTGTCTTCCCGGCTGT-3'       |
| GAPDH         | Forward: 5'-CATCACTGCCACCCAGAAGACTG-3'<br>Reverse: 5'-ATGCCAGTGAGCTTCCCGTTCAG-3'  |
| SIRP $\alpha$ | Forward: 5'-TAGTCCTGCTGATGGCTGCTCTC-3'<br>Reverse: 5'-TCGTGCAACCGTGTGGAAGATC-3'   |

## Supplementary Figures

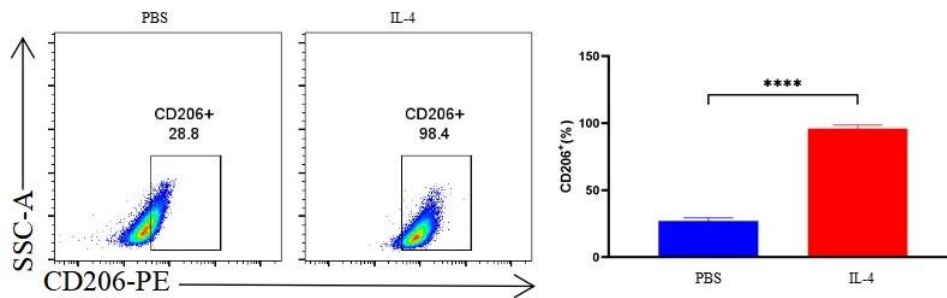

**Figure S1.** Efficiency of M2 polarization of IL-4 treated RAW 264.7 as analyzed by flow cytometry.

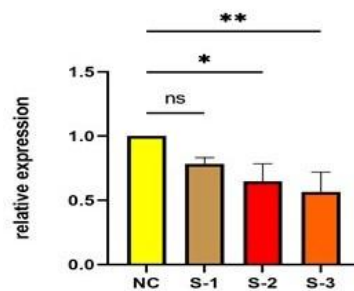

**Figure S2.** RT-PCR analysis of SIRP $\alpha$  mRNA levels in RAW264.7 cells transfected with different siRNAs (S1: SIRP $\alpha$ -1, S2: SIRP $\alpha$ -2, S3: SIRP $\alpha$ -3) for 24 h, GAPDH served as an internal control. Compared with the control group (RAW264.7), the expression of RAW264.7 decreased in the S3 group and had a significant difference ( $n = 3$ ) (\*\* $P < 0.005$ ).

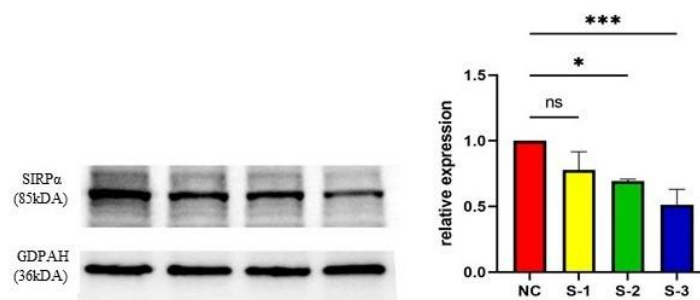

**Figure S3.** Western blot analysis of SIRP $\alpha$  protein levels in RAW264.7 cells transfected with different siRNAs (S1: SIRP $\alpha$ -1, S2: SIRP $\alpha$ -2, S3: SIRP $\alpha$ -3) for 48 h, GAPDH served as an internal control. Compared with the control group (RAW264.7), the expression of RAW264.7 decreased in the S3 group and had a significant difference ( $n = 3$ ) (\*\* $P < 0.005$ ).

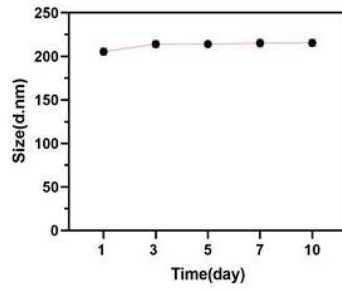

**Figure S4.** The size changes of FA-PFNB-SIRP $\alpha$  siRNA NBs for different days.

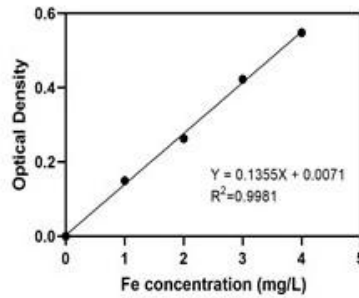

**Figure S5.** The iron standard curves by atomic absorption spectroscopy.

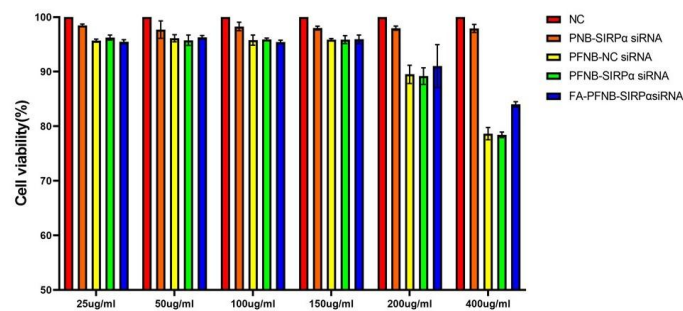

**Figure S6.** Cytocompatibility assessment for fresh mouse peritoneal macrophages treated with different concentrations of nanomaterials.

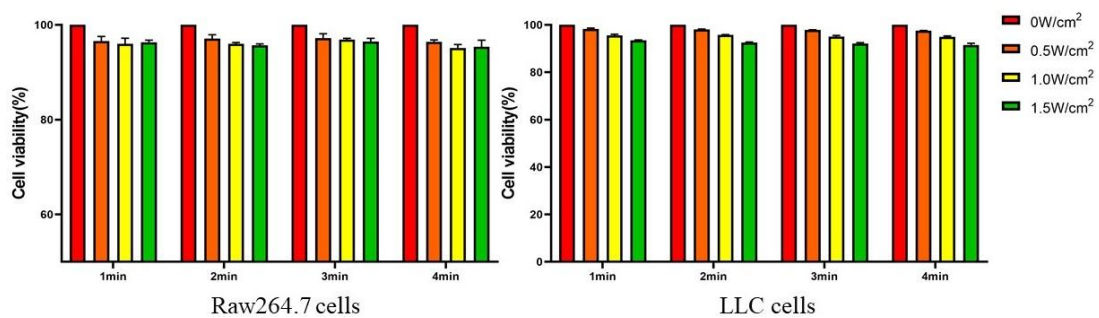

**Figure S7.** Effects of different ultrasound parameters on the viability of LLC cells and RAW264.7 cells.

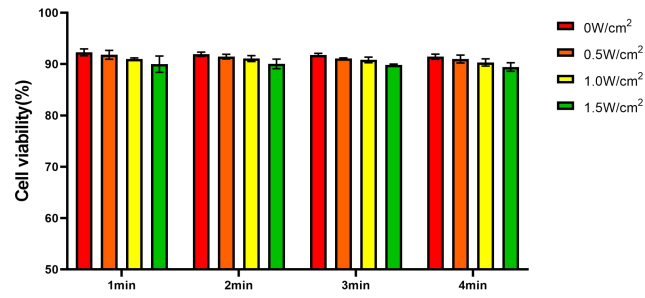

**Figure S8.** Effects of different ultrasound parameters combined with PNB-SIRP $\alpha$  siRNA (200  $\mu$ g/mL) on the viability of RAW264.7 cells.

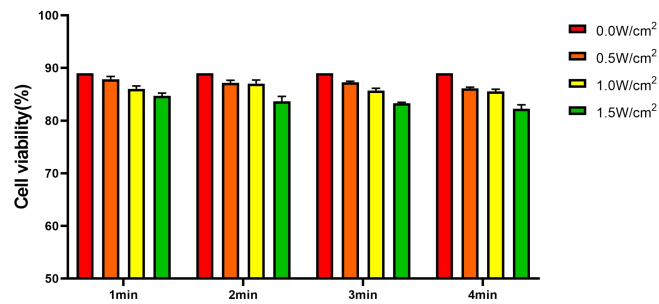

**Figure S9.** Effects of different ultrasound parameters combined with FA-PFNB-SIRP $\alpha$  siRNA (200  $\mu$ g/mL) on the viability of RAW264.7 cells.

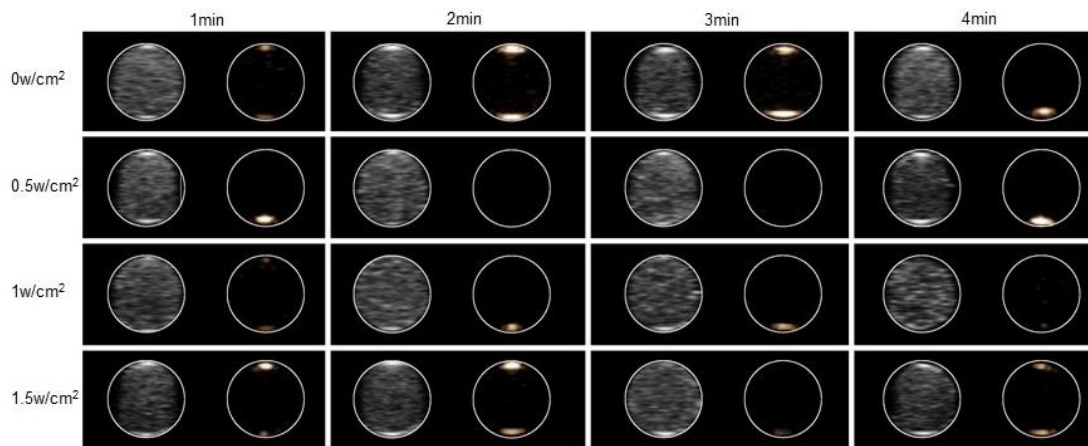

**Figure S10.** ADV and US imaging of FNB-SIRP $\alpha$  siRNA NBs at different intensities of LIFU irritation and different time in vitro. Echo intensity did not change in all cases.

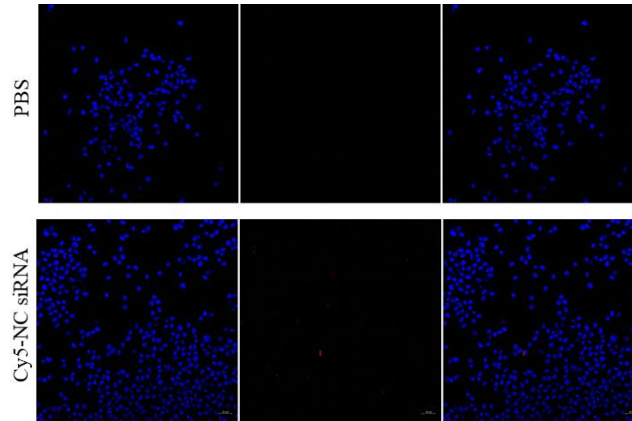

**Fig S11.** Laser confocal microscope images of the macrophage uptake of Cy5-NC siRNA.

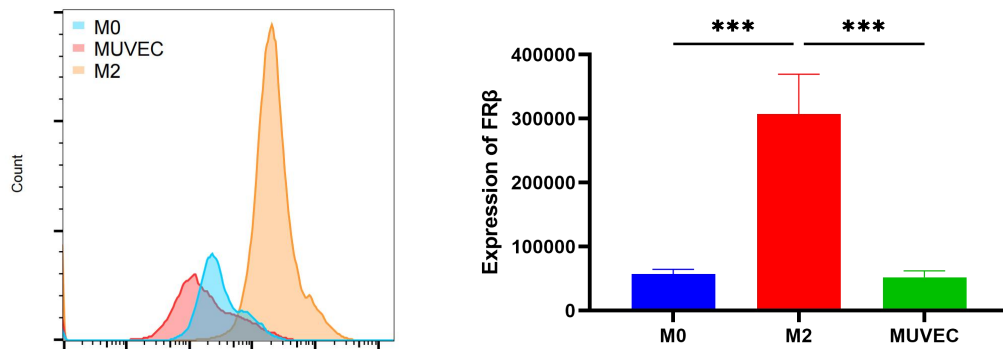

**Figure S12.** FR $\beta$  expression in different cell lines. (n = 3, \*p < 0.05; \*\*\*p < 0.005).

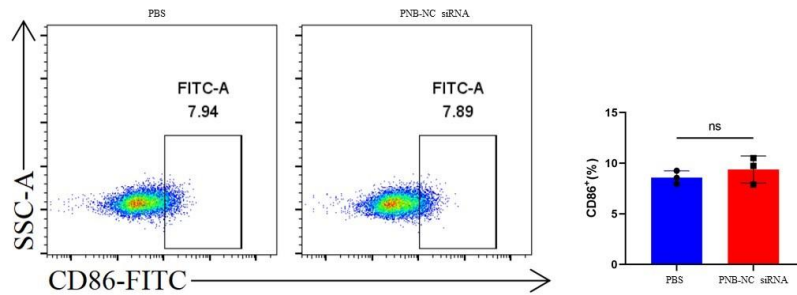

**Figure S13.** Effect of PNB-NC siRNA at different concentrations on CD86 expression in M2-like macrophages (n = 3).

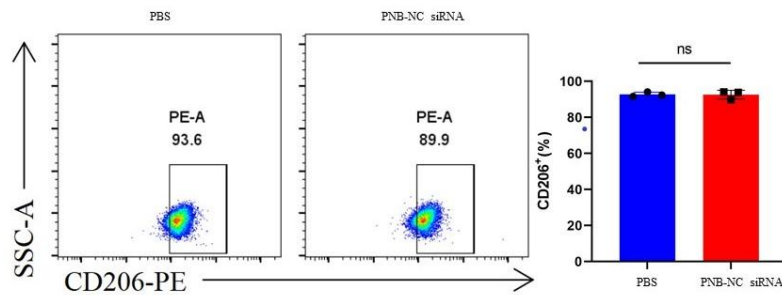

**Figure S14.** Effect of PNB-NC siRNA at different concentrations on CD206 expression in M2-like macrophages (n = 3).

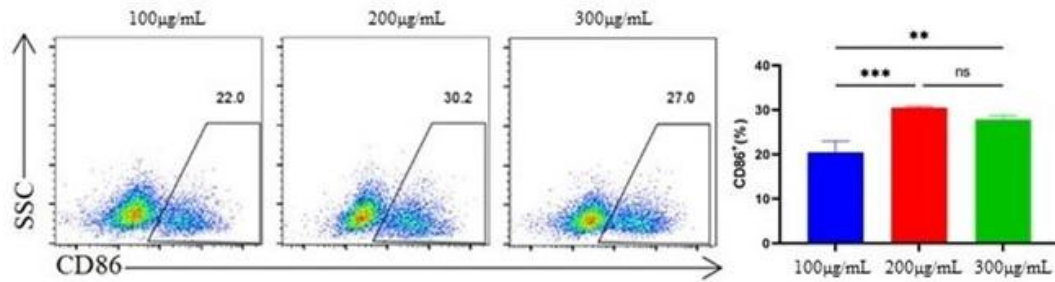

**Figure S15.** Effect of PFNB-NC siRNA at different concentrations on CD86 expression in M2-like macrophages (n = 3, \*p < 0.05; \*\*p < 0.01).

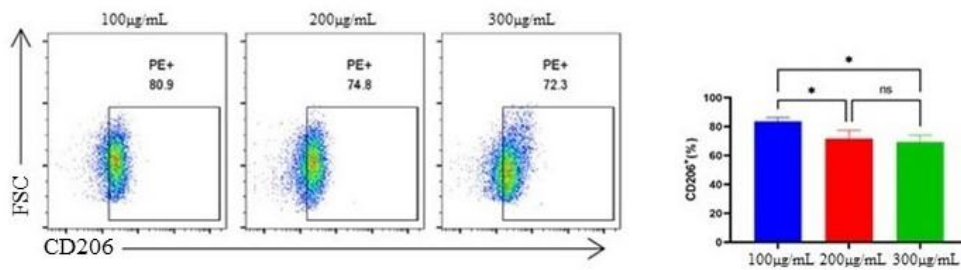

**Figure S16.** Effect of PFNB-NC siRNA at different concentrations on CD206 expression in M2-like macrophages (n = 3, \*p < 0.05).

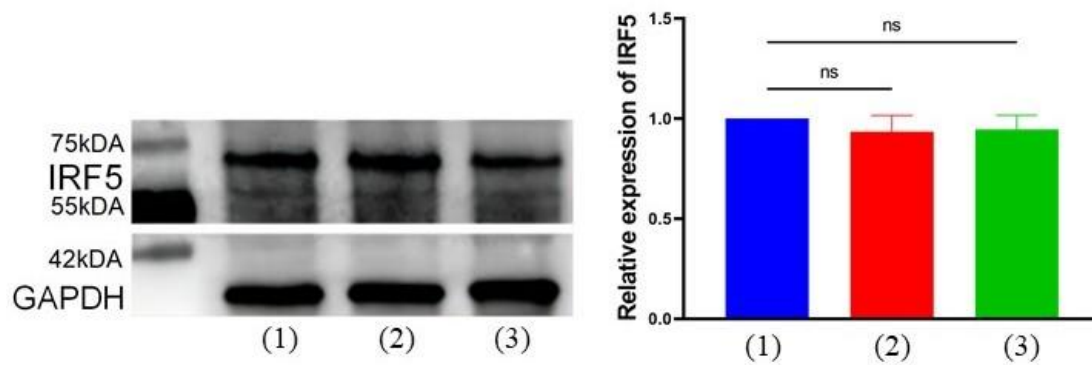

**Figure S17.** Effect of PNB-NC siRNA, Lipo-SIRP $\alpha$  siRNA on IRF5 transcription factor expression in M2-like macrophages ((1): PBS, (2): PNB-NC siRNA, (3): Lipo-SIRP $\alpha$  siRNA. PNB-NC siRNA:200 µg/mL, Lipo-SIRP $\alpha$  siRNA:120 nM).



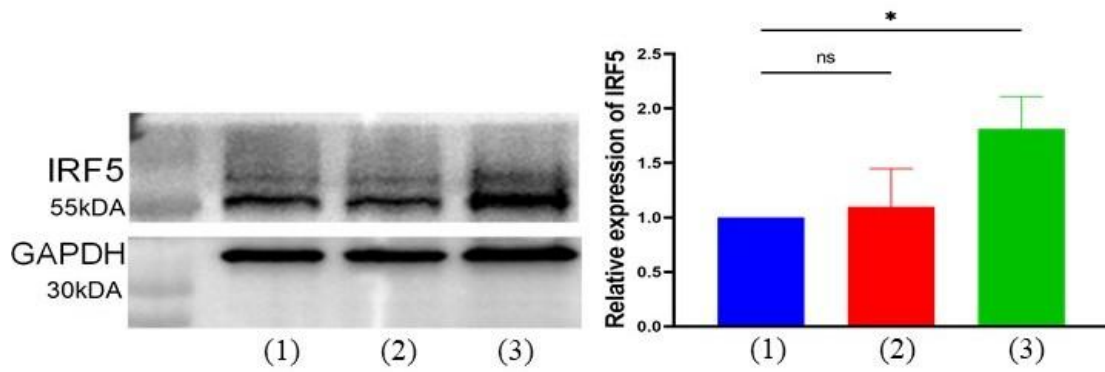

**Figure S18.** Effect of PNB-NC siRNA, PFNB-NC siRNA on IRF5 transcription factor expression in M2-like macrophages (n = 3, \*p < 0.05) ((1): PBS, (2): PNB-NC siRNA, (3): PFNB-NC siRNA. PNB-NC siRNA:200  $\mu\text{g/mL}$ , PFNB-NC siRNA: 200  $\mu\text{g/mL}$ ).

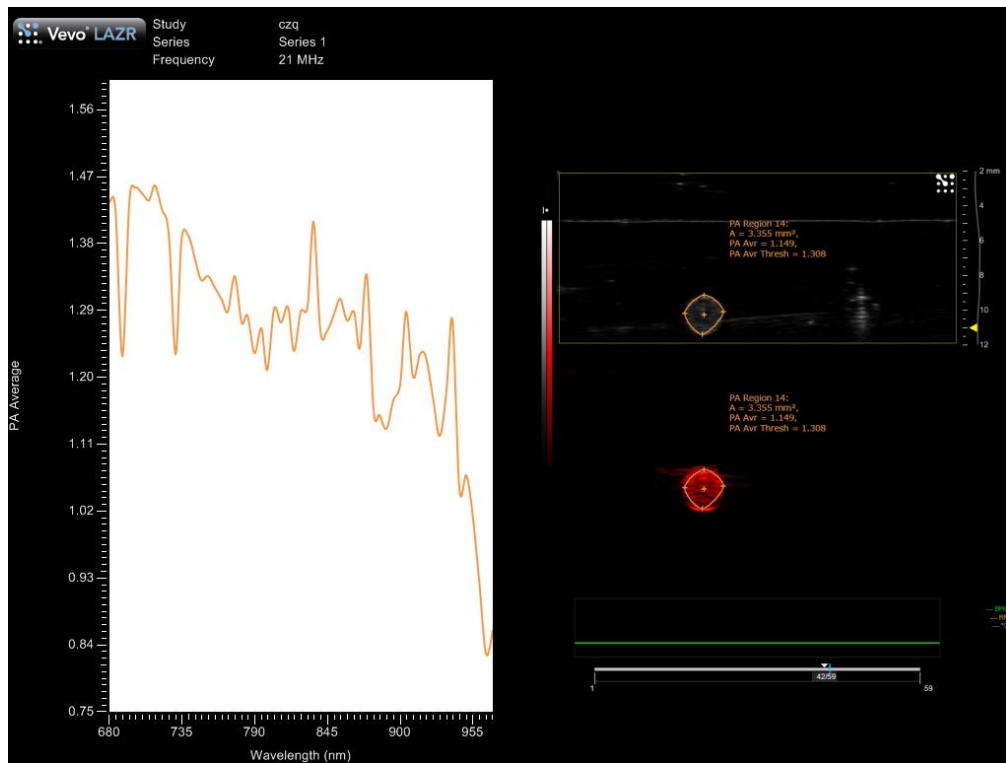

**Figure S19.** The PA signal changes of PFNB-NC siRNA irradiated by a laser at full spectrum ranging from 680 to 950 nm, and the peak appeared at 690 nm.

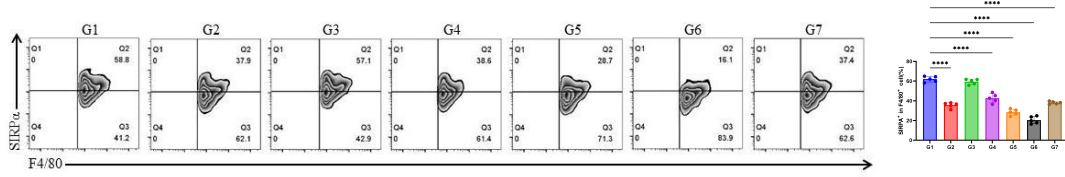

**Figure S20.** Flow cytometric analysis of the percentages of SIRP $\alpha$ <sup>+</sup> in F4/80<sup>+</sup> macrophages in the tumor of tumor-bearing mice of different groups.

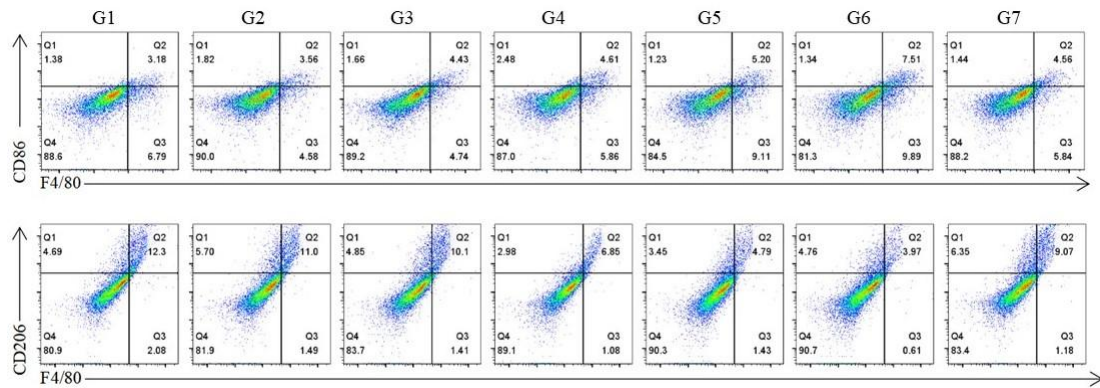

**Figure S21.** FACs plotting of F4/80<sup>+</sup>CD86<sup>+</sup>, F4/80<sup>+</sup>CD206<sup>+</sup> macrophages cells in the tumor of tumor-bearing mice. (G1) PBS group, (G2) PNB-SIRP $\alpha$  siRNA, (G3) PFNB-NC siRNA, (G4) PFNB-SIRP $\alpha$  siRNA, (G5) FA-PFNB-SIRP $\alpha$  siRNA, (G6) FA-PFNB-SIRP $\alpha$  siRNA + US, (G7) PNB-SIRP $\alpha$  siRNA+ PFNB-NC siRNA.

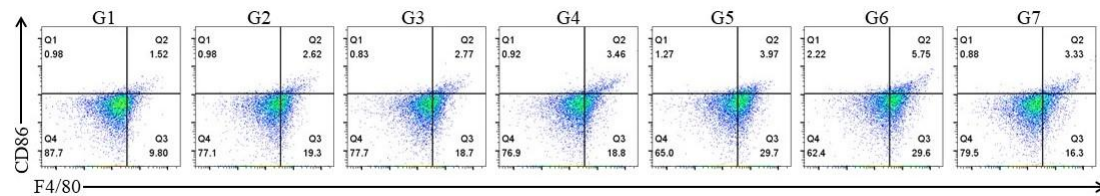

**Figure S22.** FACs plotting of F4/80<sup>+</sup>CD86<sup>+</sup> macrophages cells in the TDLN of tumor-bearing mice. (G1) PBS group, (G2) PNB-SIRP $\alpha$  siRNA, (G3) PFNB-NC siRNA, (G4) PFNB-SIRP $\alpha$  siRNA, (G5) FA-PFNB-SIRP $\alpha$  siRNA, (G6) FA-PFNB-SIRP $\alpha$  siRNA + US, (G7) PNB-SIRP $\alpha$  siRNA+ PFNB-NC siRNA.

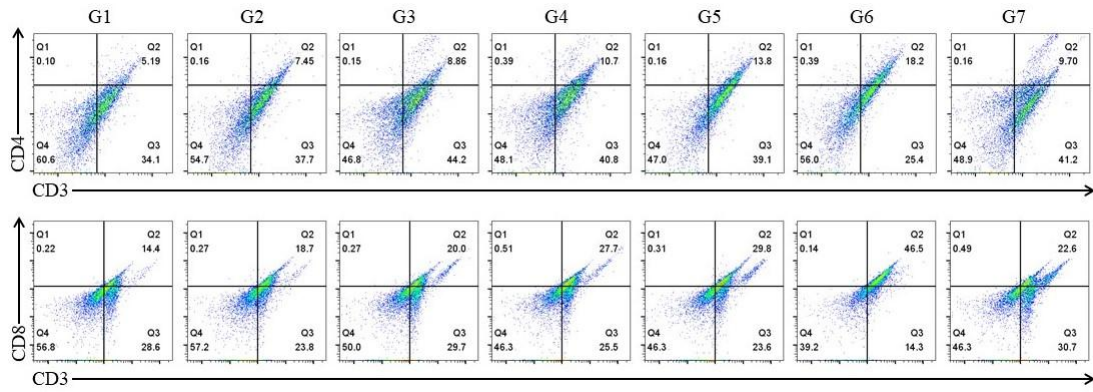

**Figure S23.** FACS plotting of CD3<sup>+</sup>CD4<sup>+</sup>, CD3<sup>+</sup>CD8<sup>+</sup> T cells in the TDLN of tumor-bearing mice. (G1) PBS group, (G2) PNB-SIRP $\alpha$  siRNA, (G3) PFNB-NC siRNA, (G4) PFNB-SIRP $\alpha$  siRNA, (G5) FA-PFNB-SIRP $\alpha$  siRNA, (G6) FA-PFNB-SIRP $\alpha$  siRNA + US, (G7) PNB-SIRP $\alpha$  siRNA+ PFNB-NC siRNA.

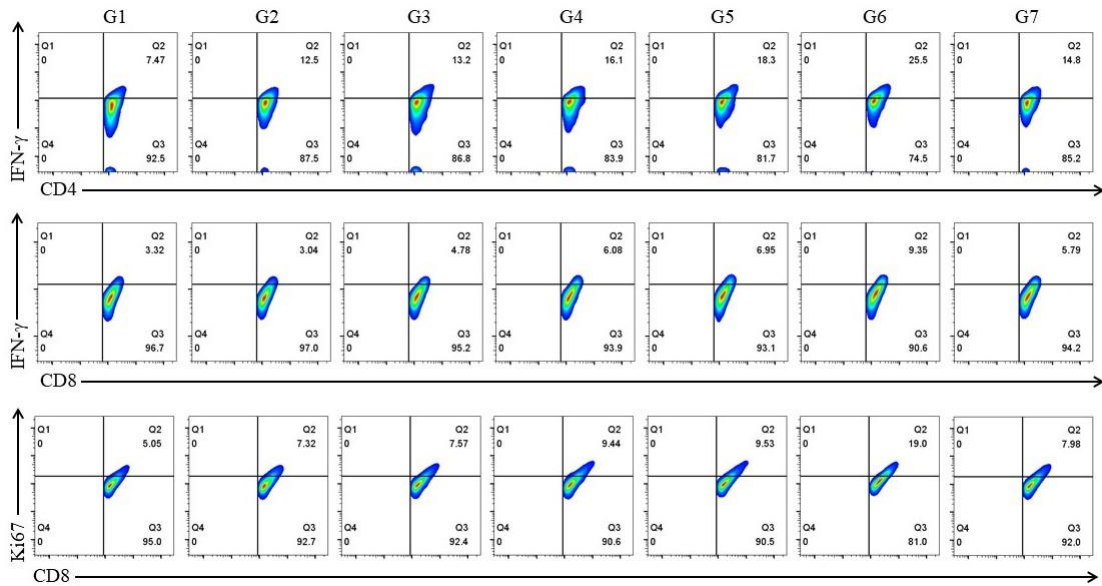

**Figure S24.** FACS plotting of IFN- $\gamma$ <sup>+</sup> in CD4<sup>+</sup>, IFN- $\gamma$ <sup>+</sup> in CD8<sup>+</sup>, Ki67<sup>+</sup> in CD8<sup>+</sup> T cells in the TDLN of tumor-bearing mice. (G1) PBS group, (G2) PNB-SIRP $\alpha$  siRNA, (G3) PFNB-NC siRNA, (G4) PFNB-SIRP $\alpha$  siRNA, (G5) FA-PFNB-SIRP $\alpha$  siRNA, (G6) FA-PFNB-SIRP $\alpha$  siRNA + US, (G7) PNB-SIRP $\alpha$  siRNA+ PFNB-NC siRNA.

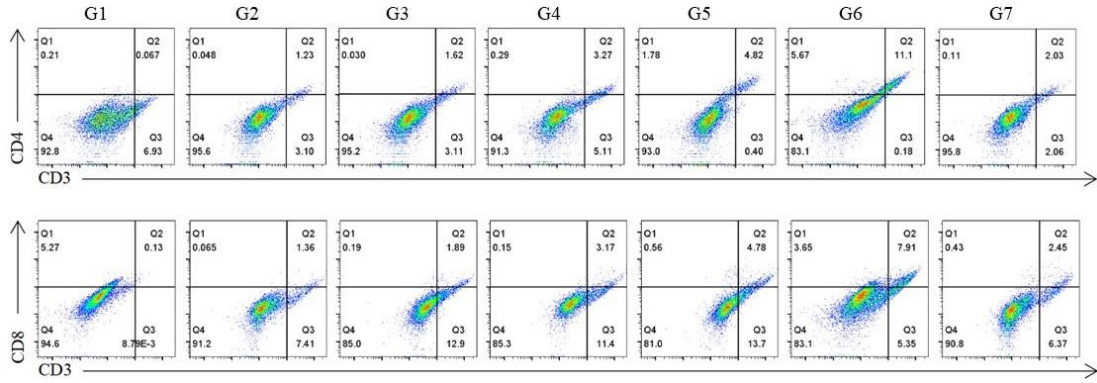

**Figure S25.** FACS plotting of CD3<sup>+</sup>CD4<sup>+</sup>, CD3<sup>+</sup>CD8<sup>+</sup> T cells in the tumor of tumor-bearing mice. (G1) PBS group, (G2) PNB-SIRP $\alpha$  siRNA, (G3) PFNB-NC siRNA, (G4) PFNB-SIRP $\alpha$  siRNA, (G5) FA-PFNB-SIRP $\alpha$  siRNA, (G6) FA-PFNB-SIRP $\alpha$  siRNA + US, (G7) PNB-SIRP $\alpha$  siRNA+ PFNB-NC siRNA.

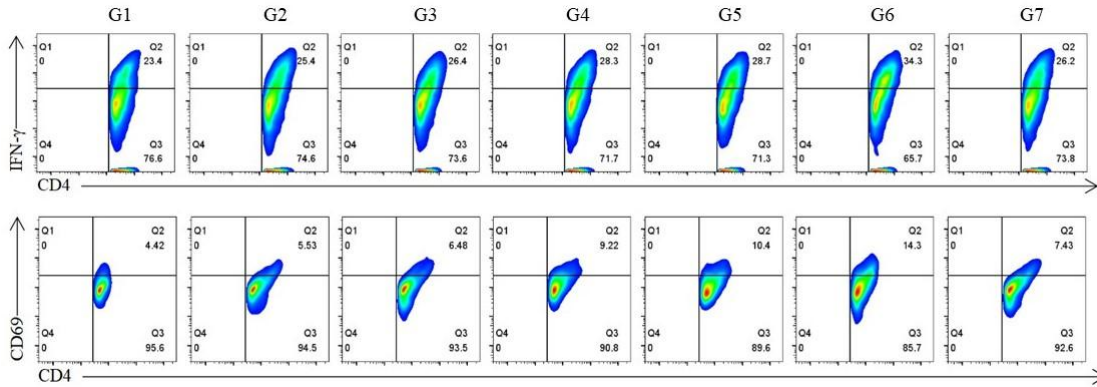

**Figure S26.** FACS plotting of IFN- $\gamma$ <sup>+</sup>CD4<sup>+</sup>, CD69<sup>+</sup>CD4<sup>+</sup> T cells in the tumor of tumor-bearing mice. (G1) PBS group, (G2) PNB-SIRP $\alpha$  siRNA, (G3) PFNB-NC siRNA, (G4) PFNB-SIRP $\alpha$  siRNA, (G5) FA-PFNB-SIRP $\alpha$  siRNA, (G6) FA-PFNB-SIRP $\alpha$  siRNA + US, (G7) PNB-SIRP $\alpha$  siRNA+ PFNB-NC siRNA.

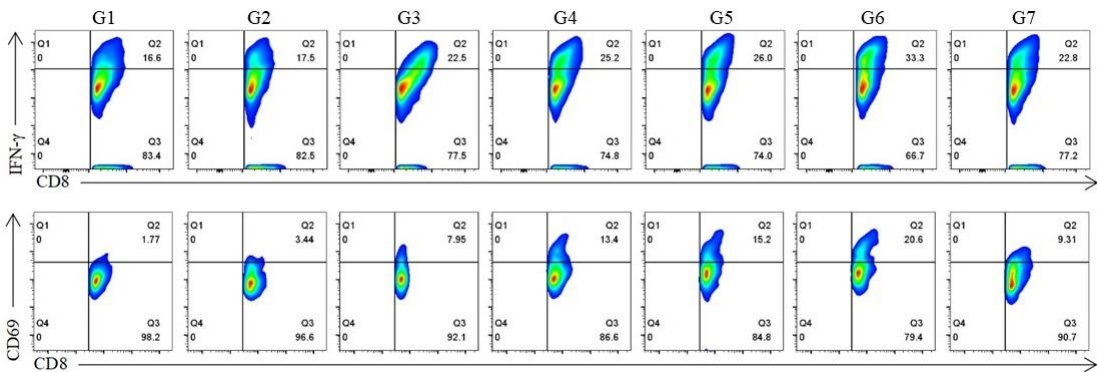

**Figure S27.** FACS plotting of IFN- $\gamma$ <sup>+</sup>CD8<sup>+</sup>, CD69<sup>+</sup>CD8<sup>+</sup> T cells in the tumor of tumor-bearing mice.

tumor-bearing mice. (G1) PBS group, (G2) PNB-SIRP $\alpha$  siRNA, (G3) PFNB-NC siRNA, (G4) PFNB-SIRP $\alpha$  siRNA, (G5) FA-PFNB-SIRP $\alpha$  siRNA, (G6) FA-PFNB-SIRP $\alpha$  siRNA + US, (G7) PNB-SIRP $\alpha$  siRNA+ PFNB-NC siRNA.

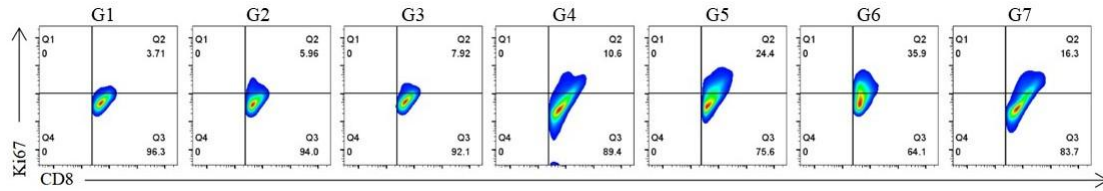

**Figure S28.** FACS plotting of Ki67<sup>+</sup>CD8<sup>+</sup> T cells in the tumor of tumor-bearing mice. (G1) PBS group, (G2) PNB-SIRP $\alpha$  siRNA, (G3) PFNB-NC siRNA, (G4) PFNB-SIRP $\alpha$  siRNA, (G5) FA-PFNB-SIRP $\alpha$  siRNA, (G6) FA-PFNB-SIRP $\alpha$  siRNA + US, (G7) PNB-SIRP $\alpha$  siRNA+ PFNB-NC siRNA.

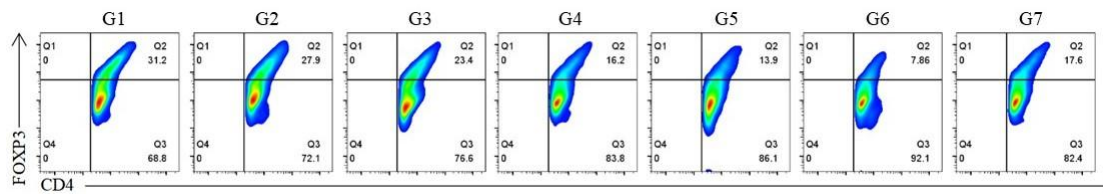

**Figure S29.** FACS plotting of FOXP3<sup>+</sup>CD4<sup>+</sup> T cells in the tumor of tumor-bearing. (G1) PBS group, (G2) PNB-SIRP $\alpha$  siRNA, (G3) PFNB-NC siRNA, (G4) PFNB-SIRP $\alpha$  siRNA, (G5) FA-PFNB-SIRP $\alpha$  siRNA, (G6) FA-PFNB-SIRP $\alpha$  siRNA + US, (G7) PNB-SIRP $\alpha$  siRNA+ PFNB-NC siRNA.

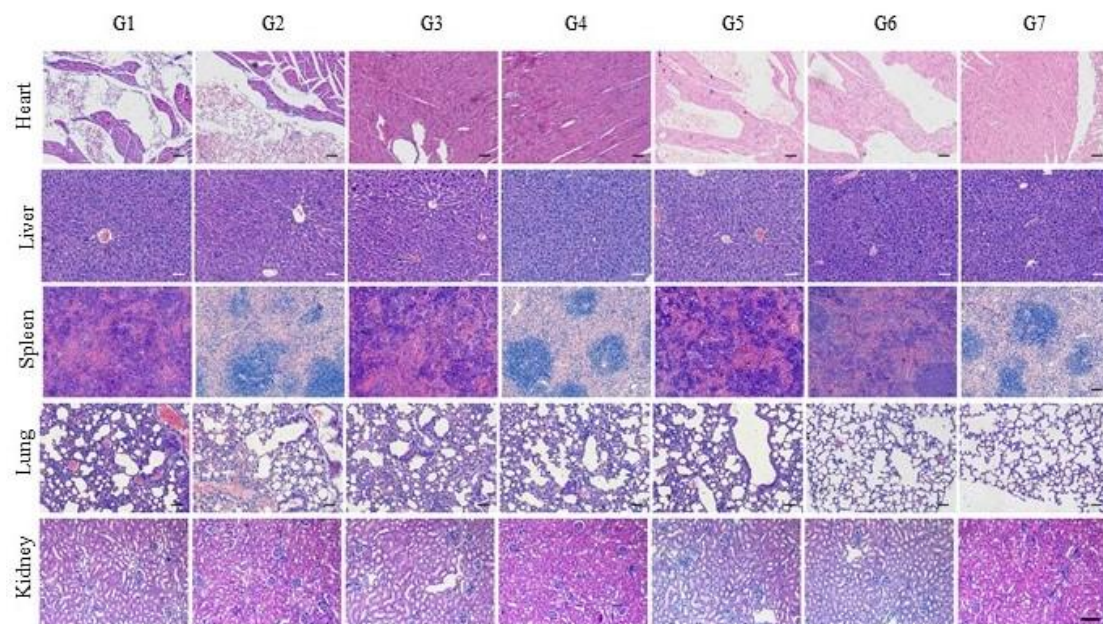

**Figure S30.** Main organs of heart, liver, spleen, lung, and kidney were collected from mice after treatment and stained with H&E staining for histological examination. (G1)

PBS group, (G2) PNB-SIRP $\alpha$  siRNA, (G3) PFNB-NC siRNA, (G4) PFNB-SIRP $\alpha$  siRNA, (G5) FA-PFNB-SIRP $\alpha$  siRNA, (G6) FA-PFNB-SIRP $\alpha$  siRNA + US, (G7) PNB-SIRP $\alpha$  siRNA+ PFNB-NC siRNA.

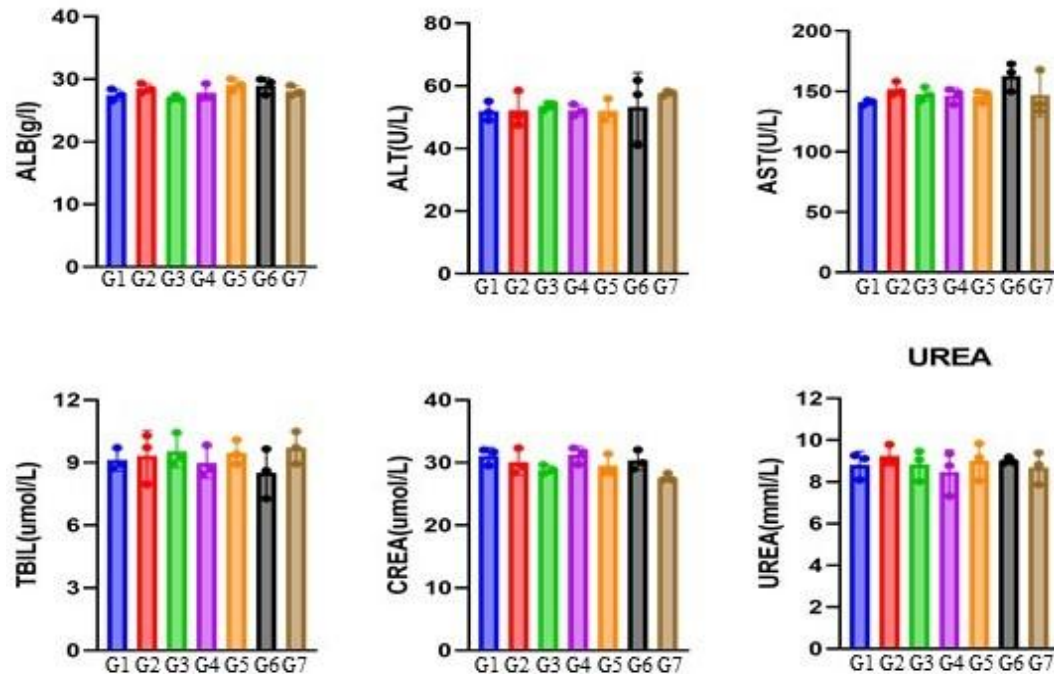

**Figure S31.** Serological biochemical analysis. Abbreviations: ALB, albumin; ALT, alanine aminotransferase; AST, aspartate aminotransferase; TBIL, total bilirubin; CREA, creatinine; UREA, urea. The reference ranges for ALB, ALT, AST, TBIL, CREA and UREA were 21.22-39.15g/L, 10.06-96.47U/L, 36.31-235.48U/L, 6.09-53.06  $\mu\text{mol/L}$ , 10.91-85.09  $\mu\text{mol/L}$  and 44.42-224.77  $\mu\text{mol/L}$ , (G1) PBS group, (G2) PNB-SIRP $\alpha$  siRNA, (G3) PFNB-NC siRNA, (G4) PFNB-SIRP $\alpha$  siRNA, (G5) FA-PFNB-SIRP $\alpha$  siRNA, (G6) FA-PFNB-SIRP $\alpha$  siRNA + US, (G7) PNB-SIRP $\alpha$  siRNA+ PFNB-NC siRNA (n = 3).

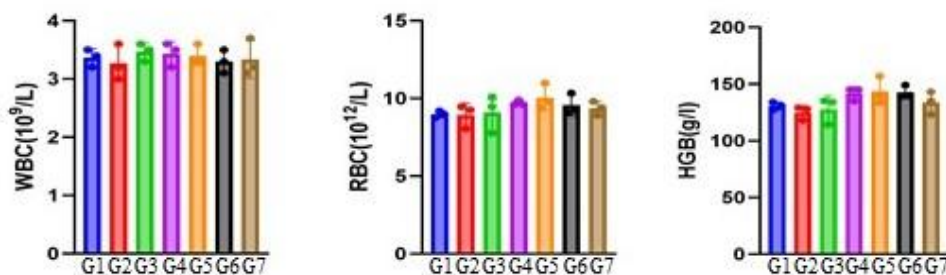

**Figure S32.** Blood routine examination. Abbreviations: WBC, white blood cell; RBC, red blood cell; and HGB, hemoglobin. The horizontal lines indicate the reference range for each analyte. The reference ranges for WBC, RBC and HGB were  $0.8-10.6 \times 10^9/\text{L}$ ,  $6.5-11.5 \times 10^{12}/\text{L}$  and 110-165 g/L, respectively. (G1) PBS group, (G2) PNB-SIRP $\alpha$  siRNA, (G3) PFNB-NC siRNA, (G4) PFNB-SIRP $\alpha$  siRNA, (G5)

FA-PFNB-SIRP $\alpha$  siRNA, (G6) FA-PFNB-SIRP $\alpha$  siRNA + US, (G7) PNB-SIRP $\alpha$  siRNA+ PFNB-NC siRNA (n = 3).
